# Supplementary material for: Selective preconcentration separation of Hg(ii) and Cd(ii) from water, fish muscles, and cucumber samples using recycled aluminum adsorbents
Source: Royal Society of Chemistry journal article supplement (doi:10.1039/d2ra00028h), 2022-01-01
Supplement: d2ra00028h1.pdf [file d2ra00028h1.pdf]

## Selective preconcentrative separation of Hg(II) and Cd(II) by using recycled aluminum adsorbents from water, fish muscles, and cucumber samples

A. B. Abdallah<sup>\*a</sup>, Ehab A. Abdelrahman<sup>b</sup>, Adel M. Youins<sup>a</sup>, Wesam A. Ibrahim<sup>a</sup>,

Magdi E. Khalifa<sup>a</sup>

<sup>a</sup> Department of Chemistry, Faculty of Science, Mansoura University, El-Gomhoria Street, Mansoura-35516, Egypt

<sup>b</sup> Chemistry Department, Faculty of Science, Benha University, Benha 13518, Egypt

\*E-mail: [ahmed.bahgat@mans.edu.eg](mailto:ahmed.bahgat@mans.edu.eg)

### Figure caption

**Fig. S1.** The XRD pattern of the BAA (A), IAA (B), and CAA (C).

**Fig. S2.** Thermal analysis curves (TGA, DTG) of: (A) Cd-BAA, (B) Hg-BAA, (C) Cd-CAA, (D) Hg-CAA, (E) Cd-IAA and (F) Hg-IAA complexes respectively.

**Fig. S3.** XPS spectra of Al 2p, C 1s, N 1s, O 1s, Si 2p, Cd 3d, and Hg 4f for the synthesized BAA sorbent before and after adsorption of mercury and cadmium.

**Fig. S4.** MEP maps of (a) dibenzoylmethane, (b) isatoic and (c) 5-(chloroacetamide)-2-hydroxybenzoic acid ligands respectively.

**Fig. S5.** Effect of kinetic on the extraction of Hg(II) and Cd(II) via pseudo first and second order models.

**Fig. S6.** Freundlich and Langmiur isotherms for the adsorption of Hg(II), and Cd(II) on the surface of BAA, IAA, and CAA.

### Table Caption

**Table S1.** pseudo first and second order parameters for the extraction of Hg(II), and Cd(II) on the surface of different adsorbents.

**Table S2.** Extraction efficiency by different washing solvents.

**Table S3.** Thermodynamic parameters of the extraction of Hg(II) and Cd(II) on the surface of BAA, IAA, and CAA.

**Table S4.** Langmuir and Freundlich constants of Hg(II) and Cd(II) adsorption.

**Table S5.** The impact of interference ions on the extraction efficiency of Hg(II) and Cd(II).

**Table S6.** Analytical figures of merit of the preconcentration procedure.

**Table S7.** The extraction percentage of mercury and cadmium by different sorbents after different cycles.

**Table S8.** Comparison of the proposed sorbents (BAA, IAA, and CAA) with the previously reported adsorbents for Hg(II), and Cd(II) detection.

## Figures

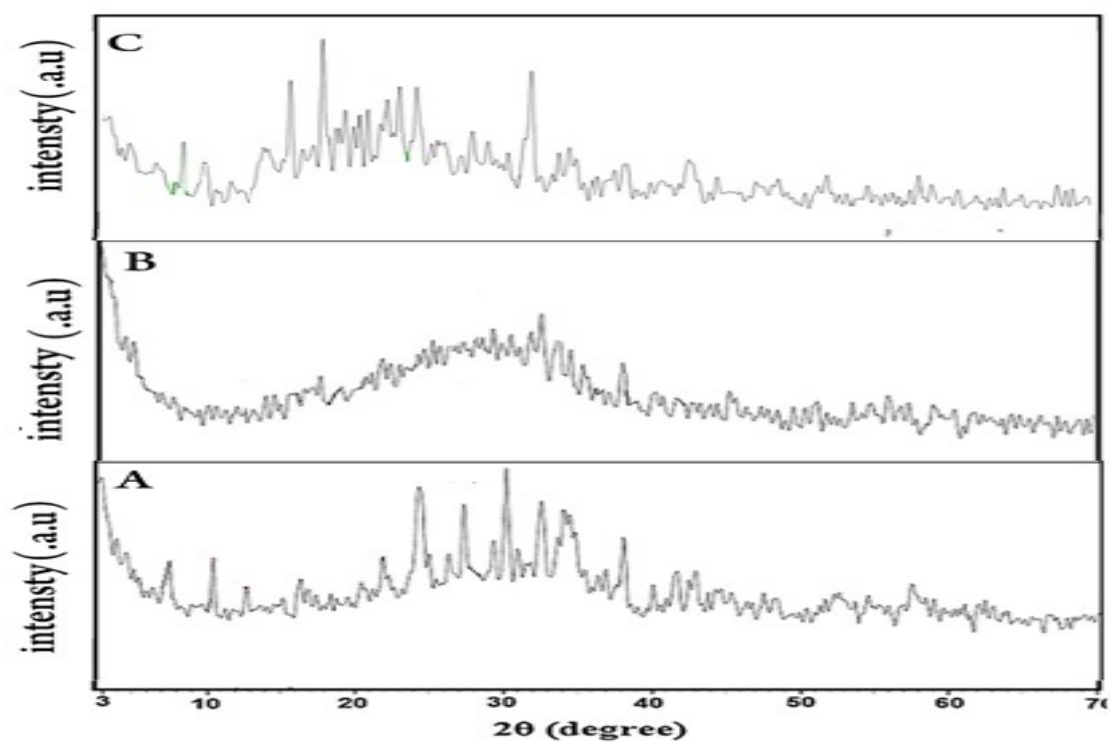

**Fig. S1.**

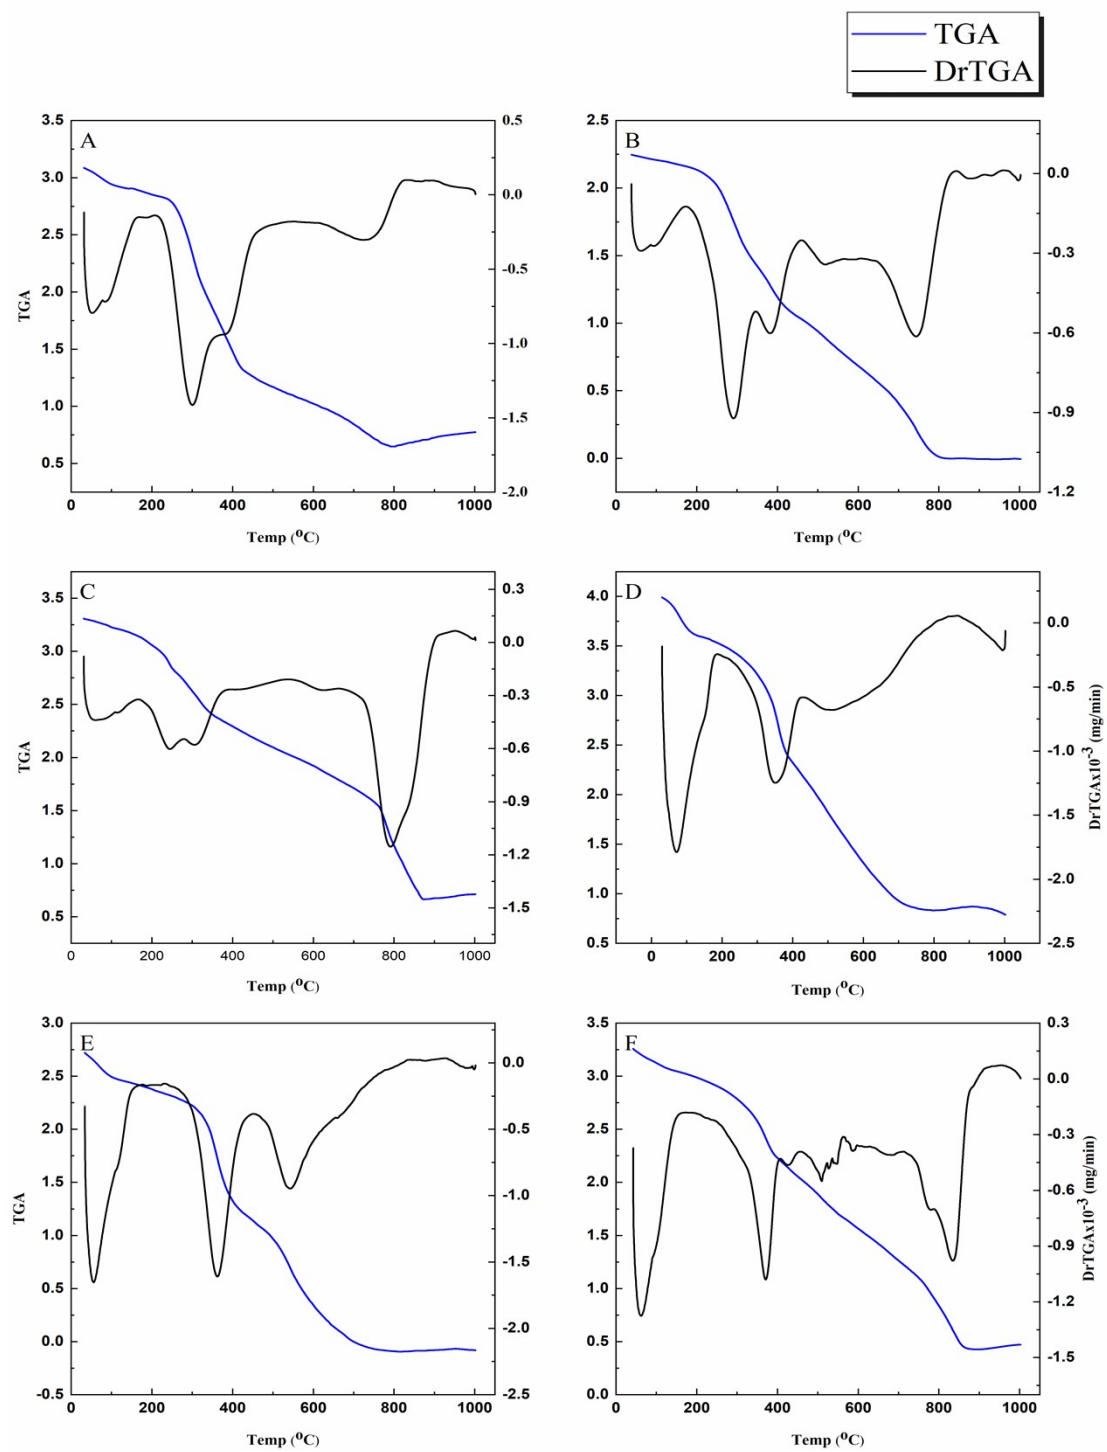

**Fig. S2**

# Before Adsorption on BAA

## Survey

22 Scans, 4 m 59.4 s, 400 $\mu$ m, CAE 200.0, 1.00 eV

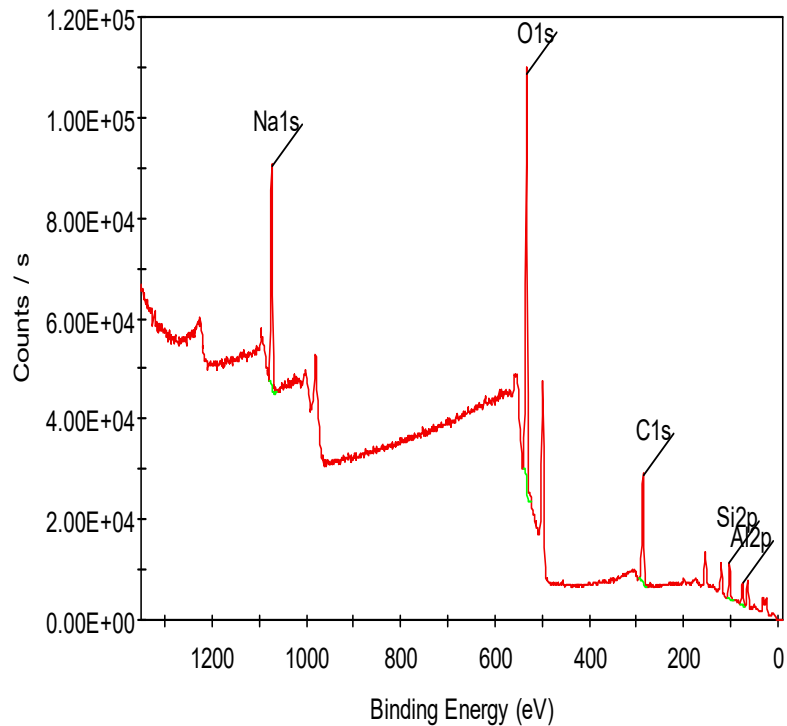

## Al 2p

Al2p Scan

10 Scans, 1 m 40.5 s, 400 $\mu$ m, CAE 50.0, 0.10 eV

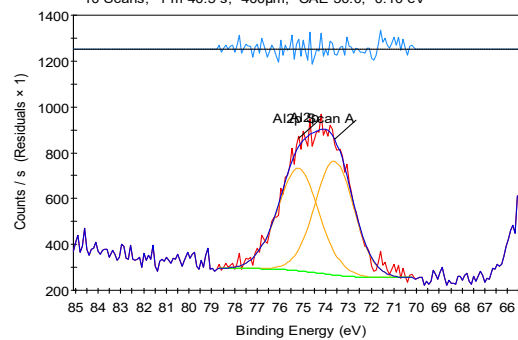

## C 1S

C1s Scan

10 Scans, 1 m 35.5 s, 400 $\mu$ m, CAE 50.0, 0.10 eV

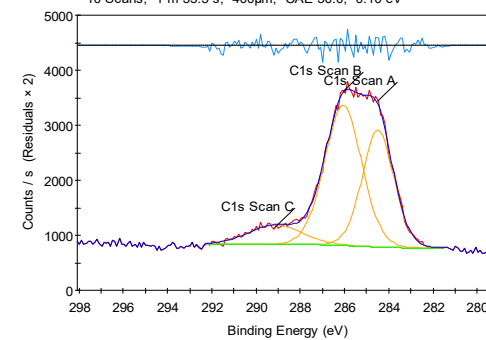

## N 1S

N1s Scan

10 Scans, 1 m 30.5 s, 400 $\mu$ m, CAE 50.0, 0.10 eV

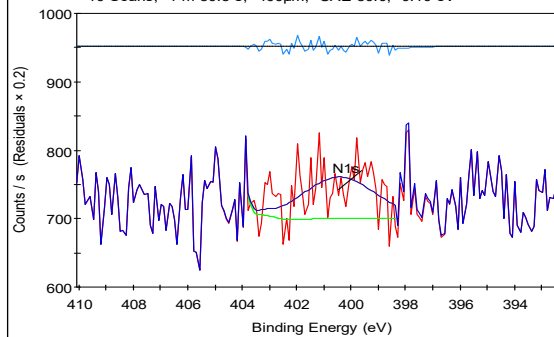

## O 1S

O1s Scan

10 Scans, 1 m 40.5 s, 400 $\mu$ m, CAE 50.0, 0.10 eV

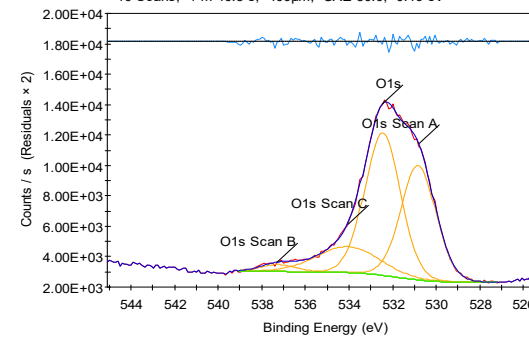

## Si 2P

## Na 1S

After Hg (II) adsorption on BAA

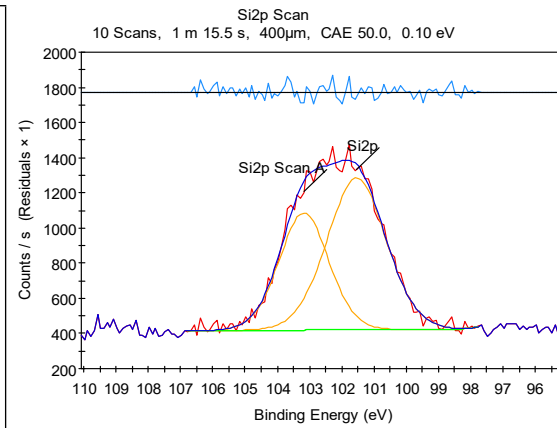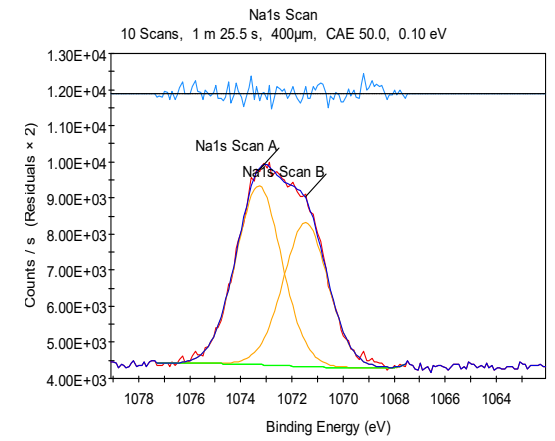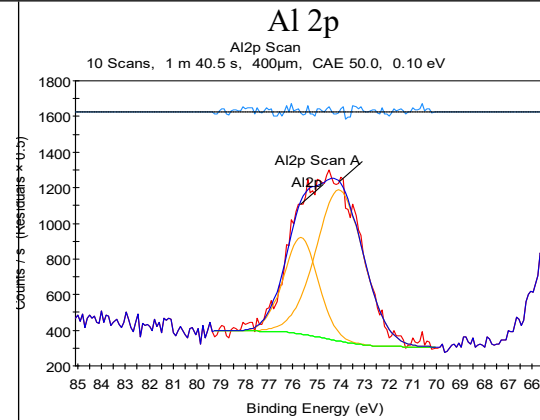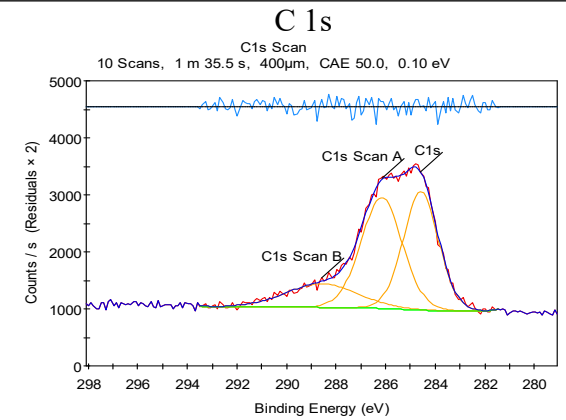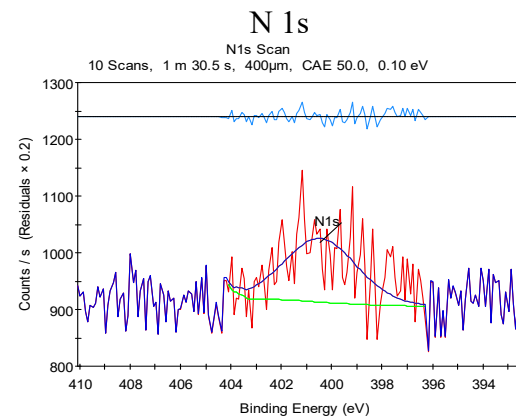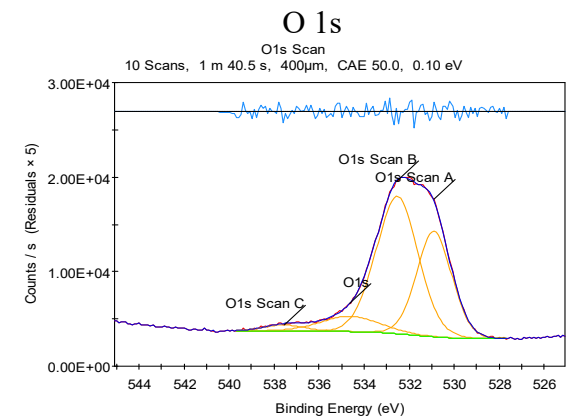

Hg 4f+Si 2p

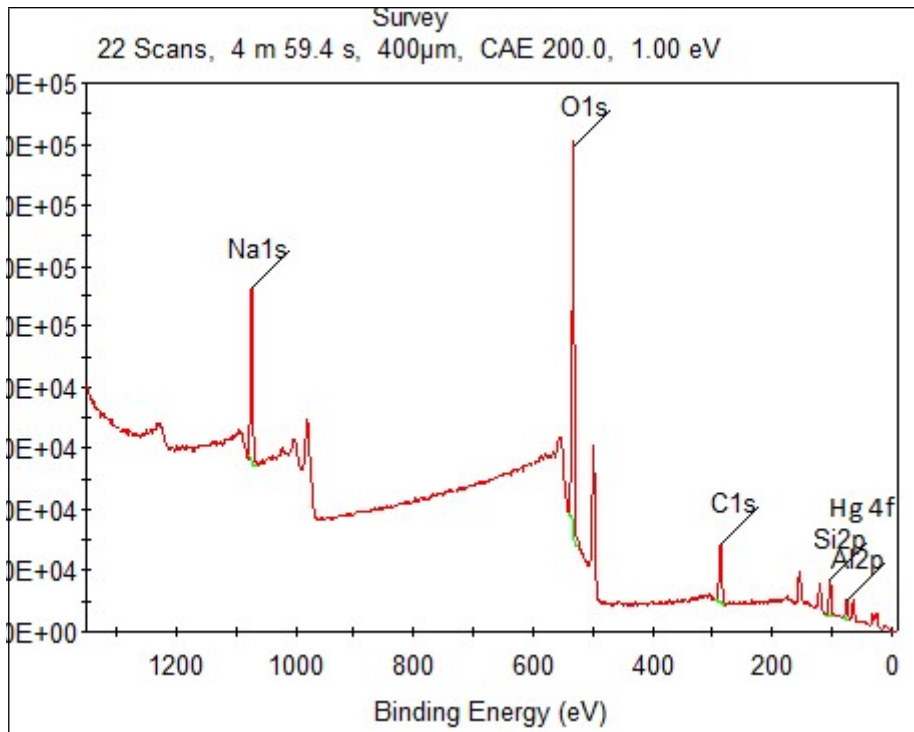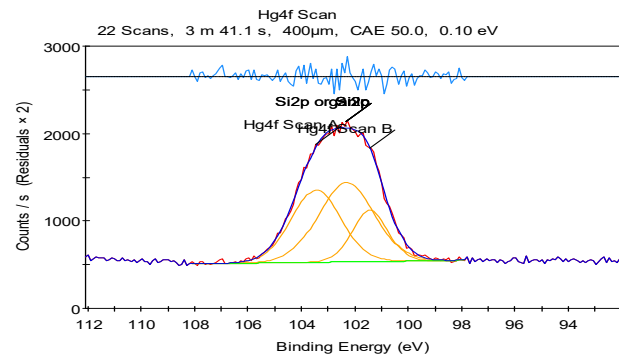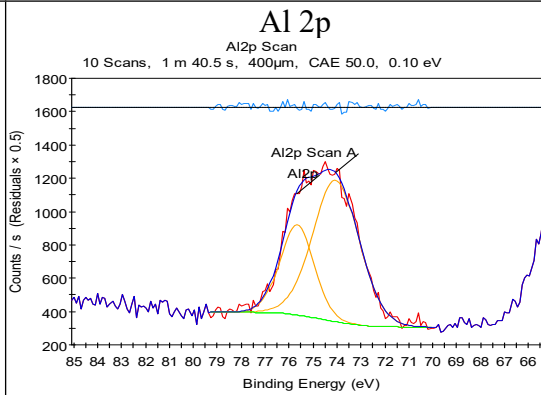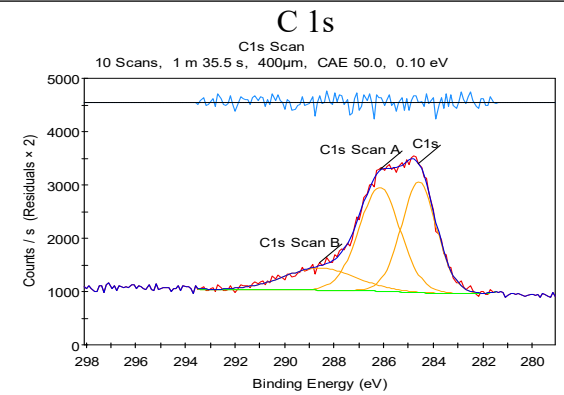

After Cd (II) adsorption on BAA

N 1s

O 1s

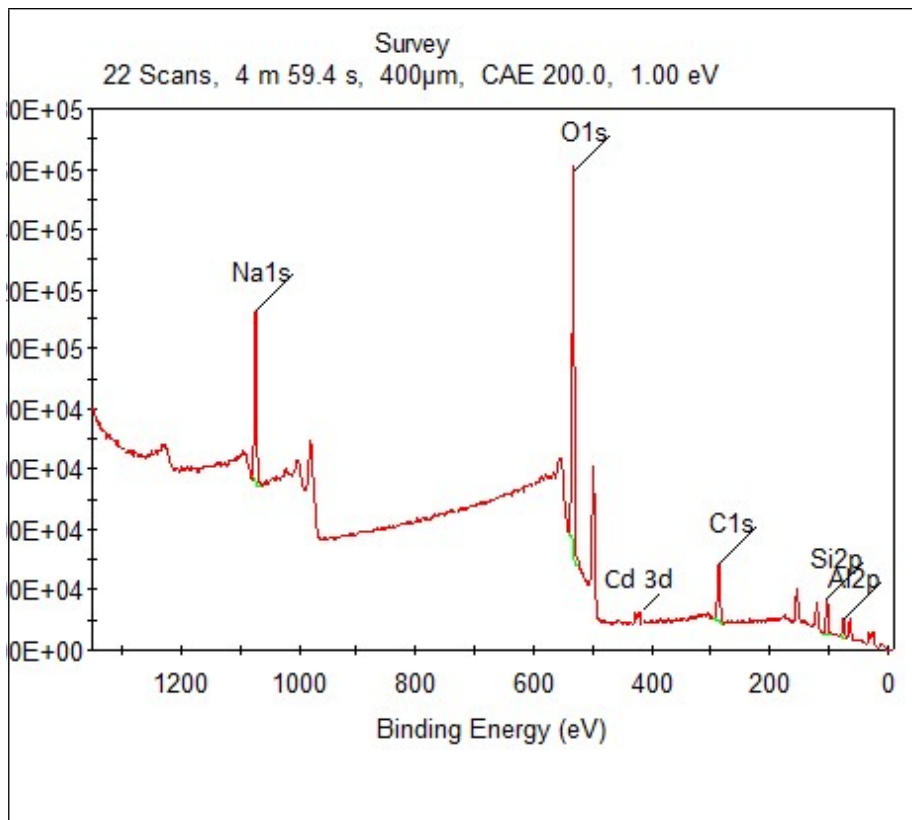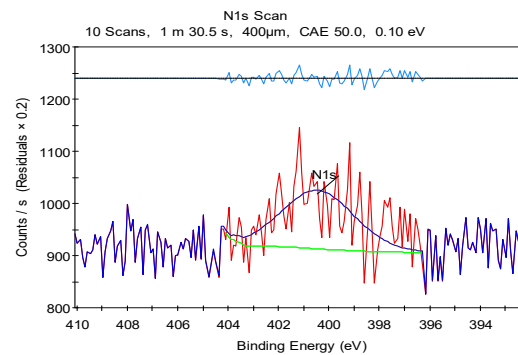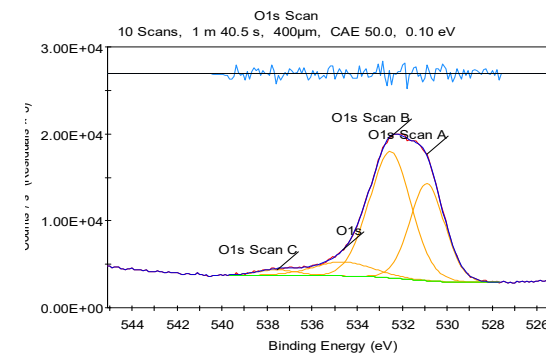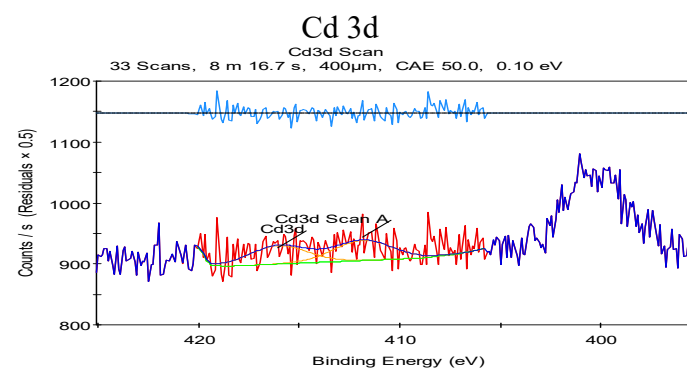

**Fig. S3.**

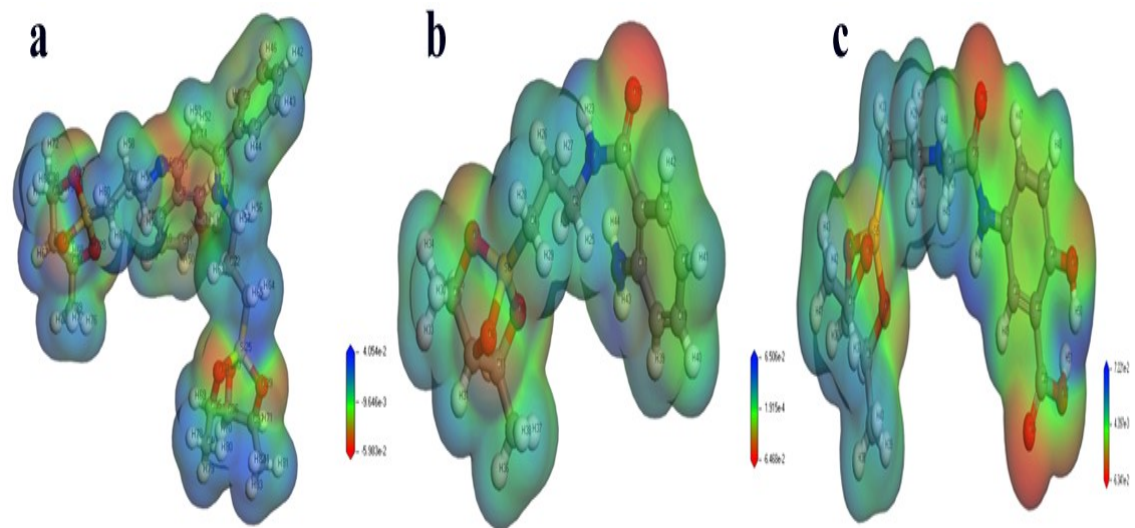

Fig. S4.

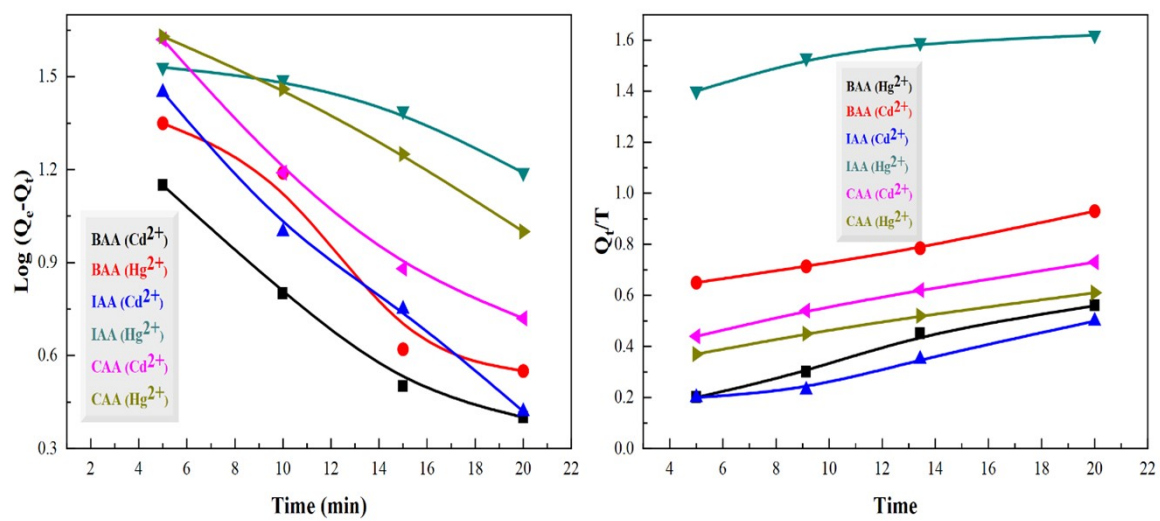

Fig. S5.



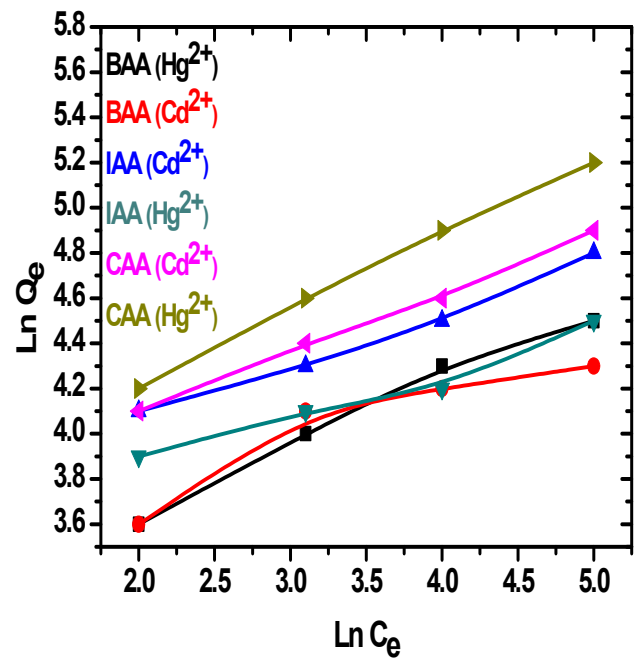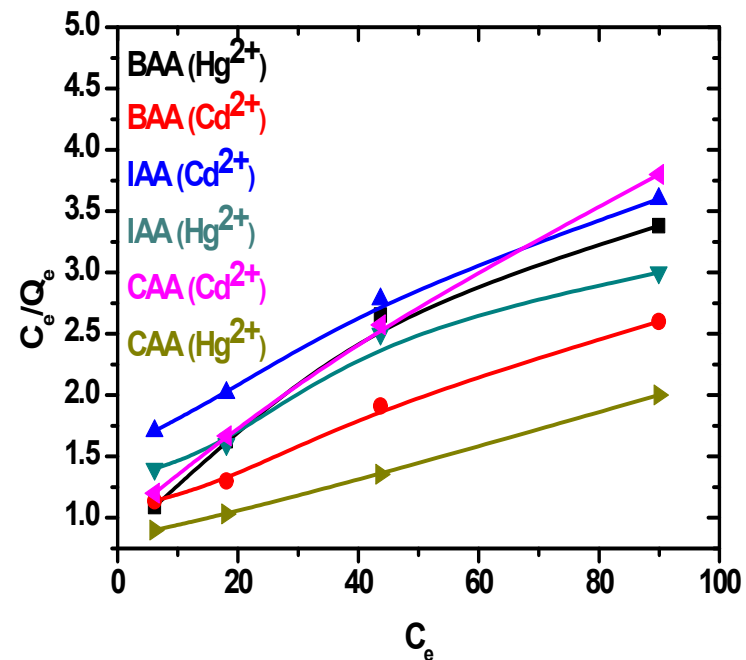

Fig. S6.

**Tables**  
**Table S1.**

| Metal  | Supporting material | First order model    |                       |                | Second order model                      |                       |                |
|--------|---------------------|----------------------|-----------------------|----------------|-----------------------------------------|-----------------------|----------------|
|        |                     | K <sub>1</sub>       | Q <sub>e1</sub>       | R <sup>2</sup> | K <sub>2</sub>                          | Q <sub>e2</sub>       | R <sup>2</sup> |
|        |                     | (min <sup>-1</sup> ) | (mg g <sup>-1</sup> ) |                | (g mg <sup>-1</sup> min <sup>-1</sup> ) | (mg g <sup>-1</sup> ) |                |
| Cd(II) | BAA                 | 0.1154               | 23.323                | 0.980          | 0.00978                                 | 39.777                | 0.994          |
|        | IAA                 | 0.1455               | 50.769                | 0.956          | 0.01476                                 | 42.7167               | 0.964          |
|        | CAA                 | 0.1426               | 84.732                | 0.944          | 0.01532                                 | 50.2512               | 0.961          |
| Hg(II) | BAA                 | 0.1400               | 44.565                | 0.967          | 0.01040                                 | 12.658                | 0.991          |
|        | IAA                 | 0.1075               | 45.814                | 0.973          | 3.814 x10 <sup>-3</sup>                 | 84.745                | 0.998          |
|        | CAA                 | 0.1107               | 80.7235               | 0.982          | 1.0036 x10 <sup>-3</sup>                | 77.519                | 0.999          |

**Table S2.**

| Metal  | sorbent | Extraction %     |        |        |        |        |        |        |        |
|--------|---------|------------------|--------|--------|--------|--------|--------|--------|--------|
|        |         | HNO <sub>3</sub> |        | HCl    |        | EDTA   |        | NaOH   |        |
|        |         | (0.1M)           | (0.5M) | (0.1M) | (0.5M) | (0.1M) | (0.5M) | (0.1M) | (0.5M) |
| Cd(II) | BAA     | 97.64            | 95.24  | 94.67  | 91.34  | 95.34  | 90.17  | 88.2   | 90.5   |
|        | IAA     | 97.34            | 95.31  | 95.79  | 91.34  | 96.37  | 92.46  | 86.3   | 91.2   |
|        | CAA     | 95.14            | 91.64  | 93.64  | 88.97  | 96.31  | 90.14  | 88.7   | 89.4   |
| Hg(II) | BAA     | 98.24            | 96.34  | 97.60  | 92.31  | 96.04  | 92.34  | 84.6   | 91.8   |

|            |       |       |       |       |       |       |      |      |
|------------|-------|-------|-------|-------|-------|-------|------|------|
| <b>IAA</b> | 96.34 | 91.37 | 94.35 | 91.34 | 93.47 | 88.24 | 89.1 | 92.1 |
| <b>CAA</b> | 97.56 | 93.24 | 94.80 | 90.42 | 92.75 | 87.91 | 89.4 | 90.8 |

**Table. S3.**

| <b>Metal</b>   | <b>Sorbent</b> | <b><math>-\Delta G^{\circ}_{\text{ads}}</math> (KJ mol<sup>-1</sup>)</b> |            |            |            |            |            | <b><math>\Delta H^{\circ}_{\text{ads}}</math><br/>(KJ mol<sup>-1</sup>)</b> | <b><math>\Delta S^{\circ}_{\text{ads}}</math><br/>(KJ mol<sup>-1</sup> k<sup>-1</sup>)</b> |            |
|----------------|----------------|--------------------------------------------------------------------------|------------|------------|------------|------------|------------|-----------------------------------------------------------------------------|--------------------------------------------------------------------------------------------|------------|
|                |                | <b>Temp (K)</b>                                                          | <b>298</b> | <b>303</b> | <b>308</b> | <b>313</b> | <b>318</b> |                                                                             |                                                                                            | <b>323</b> |
| <b>Cd (II)</b> | <b>BAA</b>     |                                                                          | -140.21    | 141.3      | -142.4     | -143.5     | -144.7     | -145.8                                                                      | -73.068                                                                                    | 0.225      |
|                | <b>IAA</b>     |                                                                          | -151.57    | -152.79    | -154       | -155.22    | -156.43    | -157.65                                                                     | -79.136                                                                                    | 0.243      |
|                | <b>CAA</b>     |                                                                          | -157.59    | -158.85    | -160.11    | -161.37    | -162.63    | -163.89                                                                     | -82.489                                                                                    | 0.252      |
| <b>Hg(II)</b>  | <b>BAA</b>     |                                                                          | -151.24    | -152.5     | -153.7     | -155.8     | -156.3     | -157.6                                                                      | -74.95                                                                                     | 0.256      |
|                | <b>IAA</b>     |                                                                          | -171.06    | -172.48    | -173.9     | -175.32    | -176.74    | -178.16                                                                     | -86.441                                                                                    | 0.283      |
|                | <b>CAA</b>     |                                                                          | -164.61    | -165.9     | -167.3     | -168.68    | -170.3     | -171.39                                                                     | -83.874                                                                                    | 0.270      |

**Table S4.**

| <b>Metal</b>  | <b>Sorbents</b> | <b>Langmuir constants</b>                          |                                                       |                      | <b>Freundlich constants</b>                        |                                                                                        |                      |
|---------------|-----------------|----------------------------------------------------|-------------------------------------------------------|----------------------|----------------------------------------------------|----------------------------------------------------------------------------------------|----------------------|
|               |                 | <b>Q<sub>m</sub></b><br><b>(mg g<sup>-1</sup>)</b> | <b>K<sub>Lang</sub></b><br><b>(L mg<sup>-1</sup>)</b> | <b>R<sup>2</sup></b> | <b>Q<sub>m</sub></b><br><b>(mg g<sup>-1</sup>)</b> | <b>K<sub>Fre</sub></b><br><b>(mg g<sup>-1</sup>) (L mg<sup>-1</sup>)<sup>1/n</sup></b> | <b>R<sup>2</sup></b> |
| <b>Cd(II)</b> | <b>BAA</b>      | 60.240                                             | 0.0104                                                | 0.991                | 71.265                                             | 21.791                                                                                 | 0.984                |
|               | <b>IAA</b>      | 62.893                                             | 0.0124                                                | 0.970                | 105.61                                             | 33.414                                                                                 | 0.961                |
|               | <b>CAA</b>      | 62.150                                             | 0.0162                                                | 0.991                | 111.04                                             | 40.690                                                                                 | 0.975                |
| <b>Hg(II)</b> | <b>BAA</b>      | 101.01                                             | 0.00722                                               | 0.982                | 216.668                                            | 53.677                                                                                 | 0.956                |
|               | <b>IAA</b>      | 101.83                                             | 0.0103                                                | 0.967                | 109.30                                             | 19.707                                                                                 | 0.962                |
|               | <b>CAA</b>      | 175.13                                             | 0.00812                                               | 0.968                | 159.11                                             | 32.040                                                                                 | 0.931                |

Table S5.

| interfering metal ion |                                     | Recovery (%) |        |        |        |        |        |
|-----------------------|-------------------------------------|--------------|--------|--------|--------|--------|--------|
| Type                  | Concentration (mg L <sup>-1</sup> ) | BAA          |        | IAA    |        | CAA    |        |
|                       |                                     | Cd(II)       | Hg(II) | Cd(II) | Hg(II) | Cd(II) | Hg(II) |
| Co(II)                | 0                                   | 98.8         | 99.1   | 98.9   | 98.49  | 99.87  | 97.9   |
|                       | 50                                  | 97.1         | 96.4   | 94.16  | 98.42  | 99.56  | 97.85  |
|                       | 80                                  | 97.3         | 95.3   | 93.14  | 95.32  | 90.24  | 94.36  |
|                       | 100                                 | 96           | 97.1   | 93.57  | 93.61  | 92.55  | 96.52  |
| Ni(II)                | 0                                   | 99.2         | 98.3   | 98.27  | 98.35  | 99.85  | 98.9   |
|                       | 50                                  | 97.9         | 96.9   | 94.11  | 98.32  | 99.11  | 97.87  |
|                       | 80                                  | 96.7         | 95.6   | 97.77  | 94.32  | 97.77  | 96.37  |
|                       | 100                                 | 95.3         | 96.1   | 90.12  | 96.16  | 95.92  | 93.36  |
| Fe(III)               | 0                                   | 98.7         | 98.4   | 97.24  | 98.57  | 99.84  | 99.9   |
|                       | 50                                  | 97.6         | 96.8   | 94.78  | 92.28  | 97.66  | 96.86  |
|                       | 80                                  | 95.9         | 94.8   | 93.02  | 91.34  | 98.32  | 93.36  |
|                       | 100                                 | 96.2         | 97.2   | 92.2   | 92.6   | 96.25  | 96.16  |
| Zn(II)                | 0                                   | 99.3         | 98.8   | 98.18  | 98.49  | 99.81  | 98.8   |
|                       | 50                                  | 98.4         | 96.9   | 97.45  | 94.19  | 94.65  | 96.29  |
|                       | 80                                  | 97.1         | 97.1   | 95.48  | 99.53  | 93.88  | 96.59  |
|                       | 100                                 | 96.2         | 94.8   | 93.50  | 91.52  | 95.70  | 94.32  |
| AL(III)               | 0                                   | 99.3         | 97.9   | 99.25  | 98.52  | 99.87  | 98.9   |
|                       | 50                                  | 98.4         | 96.4   | 98.14  | 98.25  | 99.81  | 96.84  |
|                       | 80                                  | 97.6         | 94.8   | 97.05  | 95.57  | 98.05  | 97.75  |
|                       | 100                                 | 96           | 93.8   | 96.65  | 94.89  | 92.47  | 96.57  |

**Table S6.**

| <b>Parameters</b>          |     | <b>Optimum value</b>                                                  |
|----------------------------|-----|-----------------------------------------------------------------------|
| <b>Concentration range</b> |     | <b>50-300 mg L<sup>-1</sup></b>                                       |
| <b>LOD</b>                 | BAA | 1.1 mg L <sup>-1</sup> (Hg(II))<br>1.9 mg L <sup>-1</sup> (Cd(II))    |
|                            | IAA | 9.1 mg L <sup>-1</sup> (Hg(II))<br>10.3 mg L <sup>-1</sup> (Cd(II))   |
|                            | CAA | 10.6 mg L <sup>-1</sup> (Hg(II))<br>11.2 mg L <sup>-1</sup> (Cd(II))  |
|                            | BAA | 3.66 mg L <sup>-1</sup> (Hg(II))<br>6.3 mg L <sup>-1</sup> (Cd(II))   |
| <b>LOQ</b>                 | IAA | 30.33 mg L <sup>-1</sup> (Hg(II))<br>34.3 mg L <sup>-1</sup> (Cd(II)) |
|                            | CAA | 35.3 mg L <sup>-1</sup> (Hg(II))<br>37.3 mg L <sup>-1</sup> (Cd(II))  |
|                            | BAA | 9 times                                                               |
| <b>Reusability</b>         | IAA | 8 times                                                               |
|                            | CAA | 5 times                                                               |
|                            | BAA | 0.99                                                                  |
| <b>R<sup>2</sup></b>       | IAA | 0.95                                                                  |

|                            |     |                                    |
|----------------------------|-----|------------------------------------|
|                            | CAA | 0.96                               |
| <b>Adsorption capacity</b> | BAA | 234.56 mg g <sup>-1</sup> (Hg(II)) |
|                            |     | 229.38 mg g <sup>-1</sup> (Cd(II)) |
|                            | IAA | 189.72 mg g <sup>-1</sup> (Hg(II)) |
|                            |     | 166.43 mg g <sup>-1</sup> (Cd(II)) |
|                            | CAA | 195.64 mg g <sup>-1</sup> (Hg(II)) |
|                            |     | 135.28 mg g <sup>-1</sup> (Cd(II)) |

**Table. S7.**

| No. of cycle | Extraction of Hg(II) % |      |      | Extraction of Cd(II) % |      |      |
|--------------|------------------------|------|------|------------------------|------|------|
|              | BAA                    | IAA  | CAA  | BAA                    | IAA  | CAA  |
| 1            | 98.9                   | 97.8 | 95.4 | 96.7                   | 99.1 | 95.3 |
| 2            | 98.1                   | 96.5 | 94.8 | 96.1                   | 98.8 | 95.1 |
| 3            | 97.9                   | 95.4 | 94.5 | 95.6                   | 98.5 | 94.7 |
| 4            | 97.9                   | 94.6 | 94.3 | 94.9                   | 98.5 | 94.5 |
| 5            | 97.5                   | 94.5 | 94.2 | 94.4                   | 98.3 | 94.3 |

**Table S8.**

| <b>Metal ion</b> | <b>Adsorbent</b>                                                    | <b>Adsorption capacity (mg g<sup>-1</sup>)</b> | <b>Refs.</b>              |
|------------------|---------------------------------------------------------------------|------------------------------------------------|---------------------------|
| Cd(II)           | Iron oxide (Fe <sub>2</sub> O <sub>3</sub> )                        | 86.7                                           | (Yu et al., 2021)         |
| Cd(II)           | zeolite-supported microscale zero-valent iron (Z-mZVI) w            | 63.14                                          | (Kong et al., 2017)       |
| Cd(II)           | Fe <sub>3</sub> O <sub>4</sub> /cyclodextrin polymer nanocomposites | 27.7                                           | (Badruddoza et al., 2013) |
| Cd(II)           | Activated sepiolite                                                 | 21.28                                          | (Zhou et al., 2022)       |
| Cd(II)           | BAA, IAA, and CAA                                                   | 229.38, 166.43 and 135.28                      | This study                |
| Hg(II)           | Nano silica Saccharomyces cerevisiae bio-hybrid material            | 185                                            | (Shukla et al., 2020)     |
| Hg(II)           | Modified multiwall carbon nanotubes                                 | 174.3                                          | (Esmaeili et al., 2020)   |
| Hg(II)           | Ag supported on nanomesoporous silica                               | 151                                            | (Ganzagh et al., 2016)    |
| Hg(II)           | mesoporous ZSM-5                                                    | 172.6                                          | (Abbas et al., 2018)      |
| Hg(II)           | BAA, IAA, and CAA                                                   | 234.56, 189.72 and 195.64                      | This study                |
